# Supplementary material for: Mass-independent fractionation during Mo isotope measurement by MC-ICP-MS: implications for application of the double spike technique
Source: Royal Society of Chemistry journal article supplement (doi:10.1039/d2ja00427e), 2023-01-01
Supplement: d2ja00427e1.pdf [file d2ja00427e1.pdf]

### Electronic supplementary information (ESI)

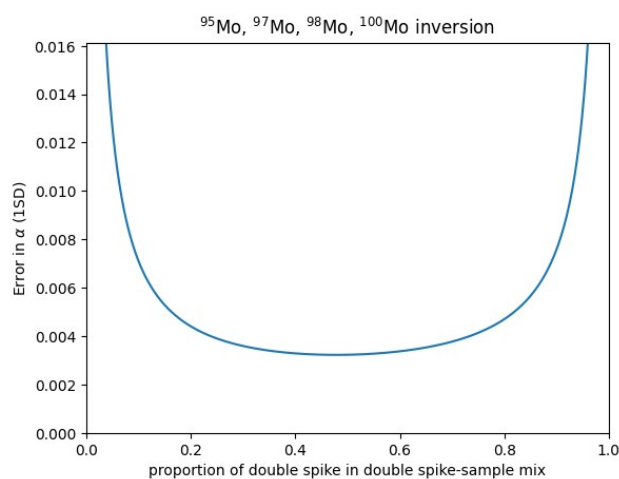

**ESI Figure S1.** Theoretical mass fractionation factor error curves simulated based on toolbox of Rudge et al.<sup>7</sup>

**ESI Table S1** Measured Mo isotope ratios for mixture of NIST SRM 3134 Mo solution and double spike

| Samples | $^{97/95}\text{Mo}$ | 2SE      | $^{98/95}\text{Mo}$ | 2SE      | $^{100/95}\text{Mo}$ | 2SE      |
|---------|---------------------|----------|---------------------|----------|----------------------|----------|
| STD-1   | 3.369531            | 0.000089 | 1.710801            | 0.000047 | 3.329690             | 0.000094 |
| STD-2   | 3.369424            | 0.000065 | 1.710754            | 0.000037 | 3.329573             | 0.000075 |
| STD-3   | 3.369433            | 0.000069 | 1.710748            | 0.000041 | 3.329599             | 0.000082 |
| STD-4   | 3.369616            | 0.000079 | 1.710883            | 0.000047 | 3.330050             | 0.000079 |
| STD-5   | 3.369878            | 0.000085 | 1.711031            | 0.000042 | 3.330479             | 0.000097 |
| STD-6   | 3.369696            | 0.000071 | 1.710930            | 0.000041 | 3.330141             | 0.000089 |
| STD-7   | 3.369772            | 0.000079 | 1.710991            | 0.000053 | 3.330413             | 0.000075 |
| STD-8   | 3.369629            | 0.000077 | 1.710882            | 0.000037 | 3.330063             | 0.000081 |
| STD-9   | 3.369891            | 0.000068 | 1.711033            | 0.000048 | 3.330516             | 0.000086 |
| STD-10  | 3.369822            | 0.000094 | 1.711058            | 0.000052 | 3.330650             | 0.000093 |
| STD-11  | 3.370006            | 0.000080 | 1.711149            | 0.000049 | 3.330899             | 0.000091 |
| STD-12  | 3.369968            | 0.000074 | 1.711131            | 0.000040 | 3.330859             | 0.000087 |
| STD-13  | 3.369916            | 0.000092 | 1.711096            | 0.000057 | 3.330686             | 0.000095 |
| STD-14  | 3.369904            | 0.000069 | 1.711077            | 0.000040 | 3.330771             | 0.000072 |
| STD-15  | 3.370008            | 0.000074 | 1.711151            | 0.000033 | 3.330891             | 0.000076 |
| STD-16  | 3.369995            | 0.000089 | 1.711115            | 0.000055 | 3.330821             | 0.000085 |
| STD-17  | 3.370092            | 0.000072 | 1.711189            | 0.000050 | 3.330969             | 0.000079 |

**ESI Code 1.** Python code for calculating theoretical mass fractionation factor errors for Mo isotope system

**ESI Code 2.** Python code for calculating propagated errors by Monte Carlo simulation
